# Supplementary material for: Facile synthesis of ultrathin Co5(O9.48H8.52)NO3 nanosheets and their electric-field assisted transformation into a defect-rich Co3O4/CoOOH heterostructure for efficient oxygen evolution
Source: Royal Society of Chemistry journal article supplement (doi:10.1039/d4ce00676c), 2024-01-01
Supplement: d4ce00676c1.pdf [file d4ce00676c1.pdf]

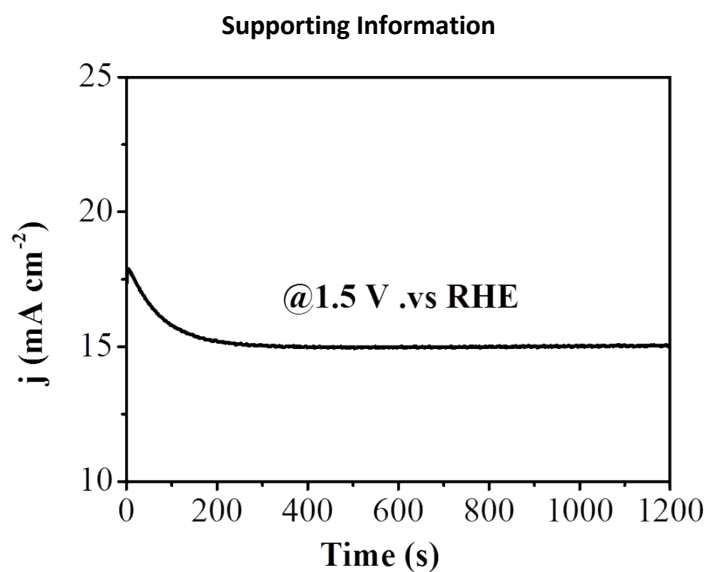

**Fig. S1** The i-t changing curve during the preparation of  $\text{Co}_3\text{O}_4/\text{CoOOH}$ .

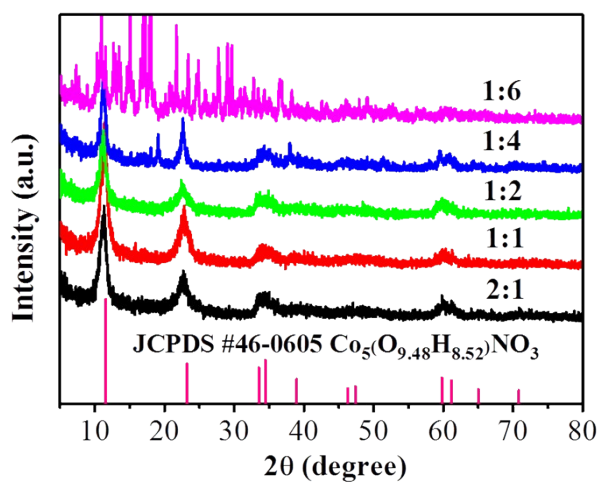

**Fig. S2** XRD patterns of various samples obtained under different molar ratio of 2-methylimidazole/ $\text{Co}(\text{NO}_3)_2$  from 0.5/1 to 6/1.

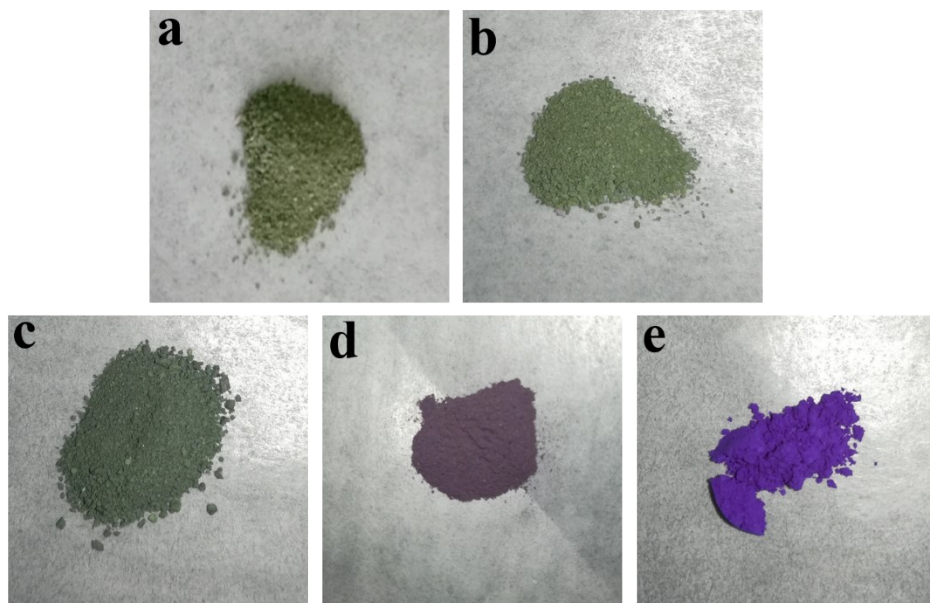

**Fig. S3** a-e) Optical photographs of various samples obtained under different molar ratio of 2-methylimidazole/ $\text{Co}(\text{NO}_3)_2$  from 0.5/1 to 6/1

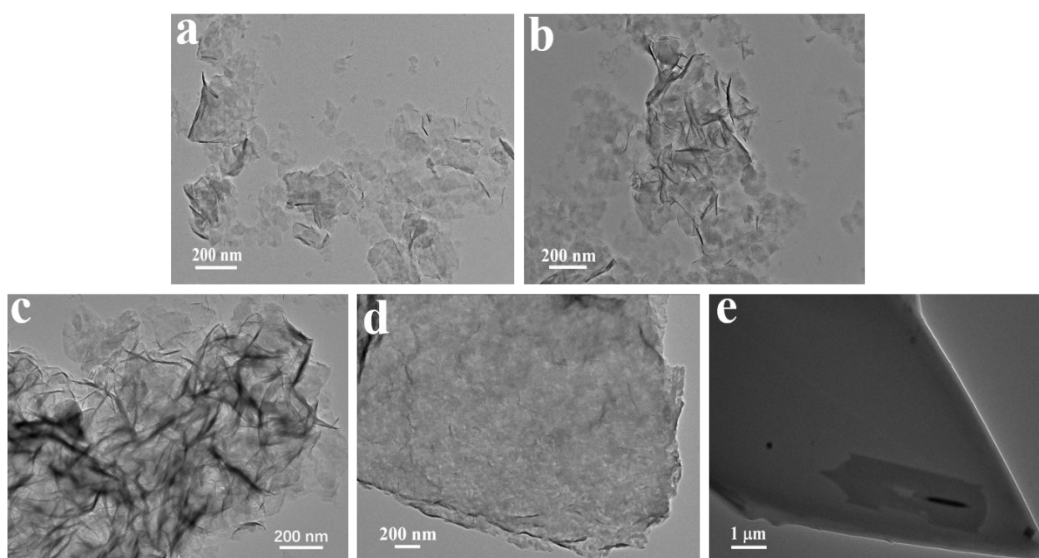

**Fig. S4** a-e) TEM images of various samples obtained under different molar ratio of 2-methylimidazole/ $\text{Co}(\text{NO}_3)_2$  from 0.5/1 to 6/1.

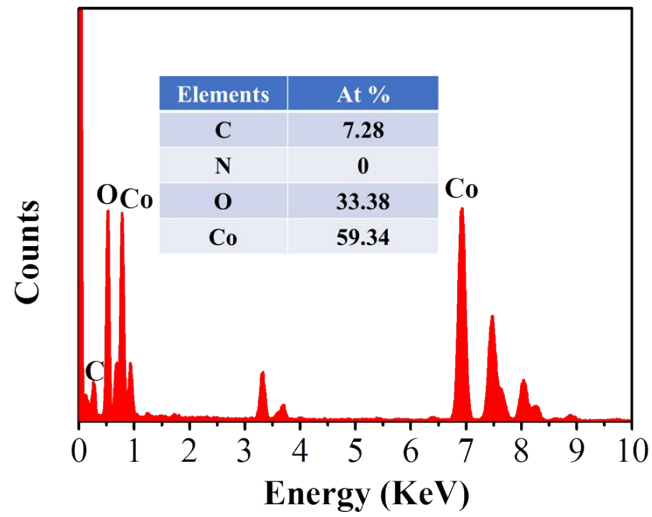

Fig. S5 EDX spectrum of  $\text{Co}_3\text{O}_4/\text{CoOOH}$  nanosheets

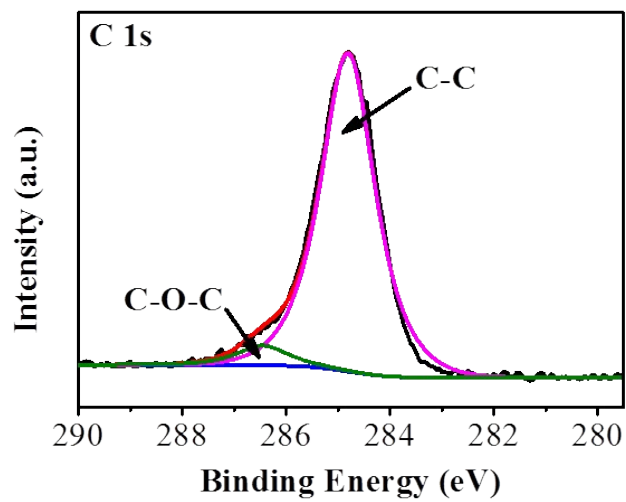

Fig. S6 C 1s high-resolution XPS spectra for  $\text{Co}_5(\text{O}_{9.48}\text{H}_{8.52})\text{NO}_3$  nanosheets measurement.

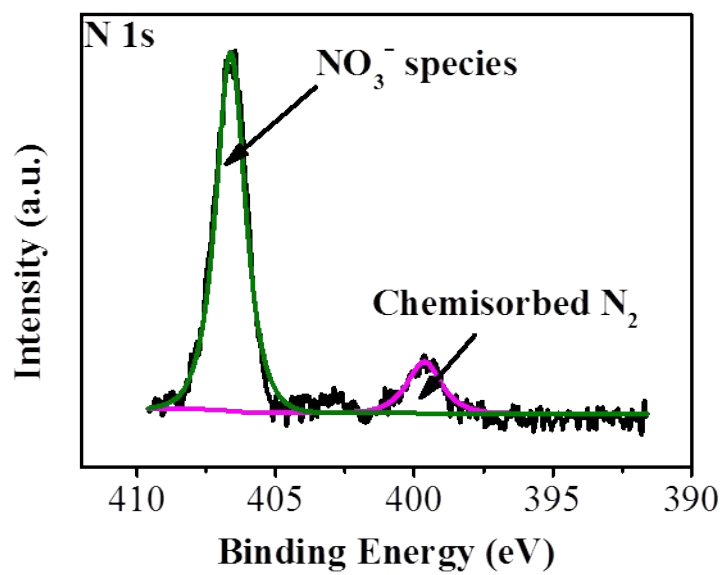

Fig. S7 N 1s high-resolution XPS spectra for Co<sub>5</sub>(O<sub>9.48</sub>H<sub>8.52</sub>)NO<sub>3</sub> nanosheets.

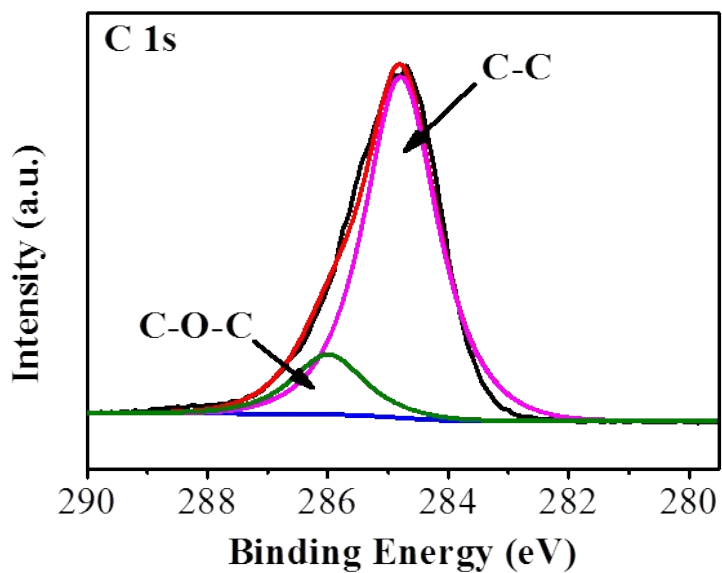

Fig. S8 C 1s high-resolution XPS spectra for Co<sub>3</sub>O<sub>4</sub>/CoOOH nanosheets measurement.

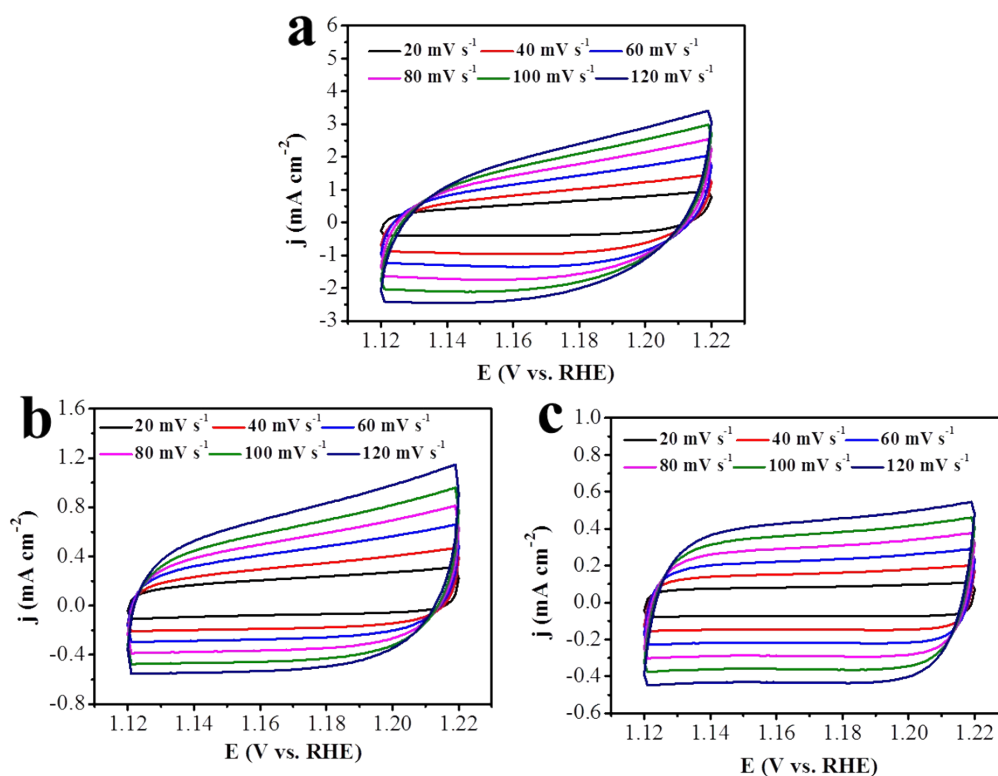

**Figure S9** CVs performed at various scan rates (20, 40, 60, 80, 100, and 120  $\text{mV s}^{-1}$ ) from 1.12 to 1.22 V vs. RHE for a)  $\text{Co}_3\text{O}_4/\text{CoOOH}$ , b)  $\alpha\text{-Co(OH)}_2$  and c) Co-MOF.

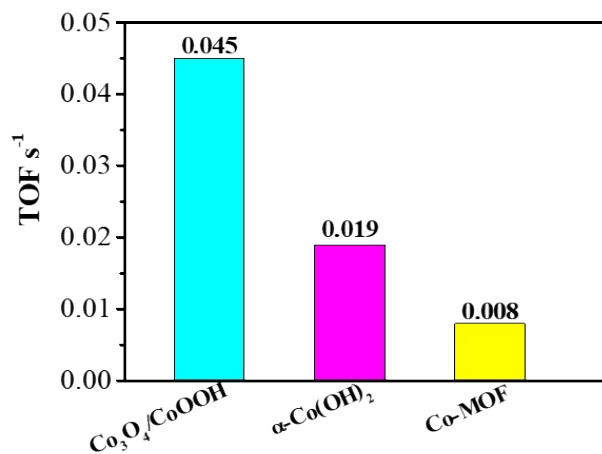

**Figure S10** TOF values calculated from the current at an overpotential of 260 mV for  $\text{Co}_3\text{O}_4/\text{CoOOH}$ ,  $\alpha\text{-Co(OH)}_2$ , Co-MOF

**Table S1** Activity comparison with the recently reported electrocatalysts in alkaline solution

| Catalyst                             | $\eta_{10}$<br>(mV) | Tafel slope<br>(mV $\text{dec}^{-1}$ ) | $C_{dl}$<br>(mF $\text{cm}^{-2}$ ) | Ref.                                               |
|--------------------------------------|---------------------|----------------------------------------|------------------------------------|----------------------------------------------------|
| $\text{Co}_3\text{O}_4/\text{CoOOH}$ | 260                 | 52                                     | 39.9                               | This work                                          |
| FeCoZn-SACs                          | 280                 | 101                                    | /                                  | <i>ACS Nano</i> , 2023, <b>17</b> , 18128-18138.   |
| MXene/ $\text{NiFeP}_x\text{-NC}$    | 240                 | 81.2                                   | 9.4                                | <i>J. Adv. Ceram.</i> , 2023, <b>12</b> , 553-564. |

|                                                                        |     |       |       |                                                               |
|------------------------------------------------------------------------|-----|-------|-------|---------------------------------------------------------------|
| Mo <sub>6</sub> Co <sub>6</sub> C <sub>2</sub> /Co/HNC-1               | 284 | 68.5  | 20.3  | <i>J. Colloid. Interf. Sci.</i> , 2023, <b>636</b> , 450-458. |
| Cu@Cu(OH) <sub>2</sub><br>NRs/HKUST-1                                  | 310 | 167.5 | /     | <i>Nano. Res.</i> , 2023, <b>16</b> , 8012-8017.              |
| CoO@SCoTe                                                              | 246 | 56    | 13.9  | <i>Adv. Sci.</i> , 2023, <b>10</b> , 2206204.                 |
| Mo <sub>0.9</sub> Ni <sub>0.05</sub> Fe <sub>0.05</sub> O <sub>2</sub> | 249 | 58.6  | 3.53  | <i>Chem. Eng. J.</i> , 2022, <b>443</b> , 136339.             |
| IrFe-N-C                                                               | 350 | 43    | /     | <i>ACS Catal.</i> , 2022, <b>12</b> , 9397-9409.              |
| CoTAPP-PATA-COF                                                        | 420 | 56    | 10.64 | <i>Angew. Chem. Int. Ed.</i> , 2022, <b>61</b> , e202213522.  |
| NP-ACSs@NiFe-MOFs                                                      | 230 | 45.8  | 36    | <i>Adv. Funct. Mater.</i> , 2023, 2301013.                    |
| O-Co-N/C                                                               | 290 | 86    | /     | <i>Adv. Funct. Mater.</i> , 2022, <b>32</b> , 2200763.        |
| NCOSH                                                                  | 243 | 63    | 27.3  | <i>Adv. Energy Mater.</i> , 2022, <b>12</b> , 2103275.        |
| CoCo <sub>2</sub> O <sub>4</sub> /NCNTs                                | 350 | 159.7 | 7.12  | <i>Angew. Chem. Int. Ed.</i> , 2022, <b>61</b> , e202114696.  |
| S-FeOOH/IF                                                             | 244 | 59    | 4.64  | <i>Adv. Funct. Mater.</i> , 2022, 2112674.                    |
| Ni SAs@S/N-FCS                                                         | 249 | 56.5  | 2.63  | <i>Angew. Chem. Int. Ed.</i> , 2022, <b>61</b> , e202212542   |

---
